# Supplementary material for: Transformations of silver(i) chalcogenide clusters induced by halide ions as dopant components rather than surface active species
Source: Royal Society of Chemistry journal article supplement (doi:10.1039/d3ce00716b), 2023-01-01
Supplement: d3ce00716b1.pdf [file d3ce00716b1.pdf]

**Transformations of Silver(I) Chalcogenide Clusters Induced by  
Halide Ions as Dopant Components rather than Surface Kinetics  
Species**

Yu-Quan Gao, Wei-Hong Wu, Hui Mao, Ya-Ge Zhang, Cai-Hong Zhan\*, Zhan-Guo Jiang\*

Key Laboratory of the Ministry of Education for Advanced Catalysis Materials,  
Institute of Physical Chemistry, College of Chemistry and Materials Science, Zhejiang  
Normal University

E-mail: chzhan@zjnu.cn; jzg@zjnu.cn.

## Experimental Section

### Chemicals

All chemicals and solvents obtained from suppliers were used without further purification. All solvents were analytical grade reagent.

### Characterization

UV–vis spectra were measured on an Analytik Jena S600 UV–visible spectrophotometer. PL spectra were carried out with an RF-6000 fluorescence spectrometer. X-ray photoelectron spectroscopy (XPS) survey was conducted by a VG multilab ESCA system. High resolution mass spectrometry was recorded on an Agilent 6224 (Agilent Technologies, USA) ESI-TOF-MS spectrometer.

### Crystal data and structure refinement

Single-crystal X-ray diffraction data collection was recorded on Bruker D8 VENTURE diffractometer equipped with a PHOTON 100 CMOS bidimensional detector and MoK $\alpha$  monochromatized radiation ( $\lambda = 0.71073 \text{ \AA}$ ). The structure was solved by intrinsic phasing methods and refined by full-matrix least squares using the SHELX-TL package and OLEX 2.

Specific Refinement Details as follow: All Ag Cl S Br and atoms and part coordinated CCBu<sup>t</sup> ligands were located in the electron density. All heavy Ag Cl S and Br atoms were refined with anisotropic thermal parameters. DFIX restraints were applied to keep some bond lengths of Bu<sup>t</sup> and counter ions in reasonable ranges. SIMU restraints were also used for all C and some disordered silver atoms and counter ions of SbF<sub>6</sub><sup>-</sup>. Solvent molecules were taken into account with the SQUEEZE/PLATON procedure.

In all, despite an R<sub>1</sub> value that was a less than ideal and resolution that was poorer than generally obtained in crystallography of some small molecules, a reasonable quality refinement was achieved, and the current data is more than adequate for establishing the average connectivity of the structure. Crystallographic data for single-crystal X-ray diffraction studies are summarized in Table S1-3. Further details about of the crystal structure determinations may be obtained free of charge at <http://www.ccdc.cam.ac.uk/>. CCDC 2278716, 2278717, 2278735.

**Table 1 Crystal data and structure refinement for  $\{\text{Ag}_{45}(\text{ClS})_6\}^{\text{a}}$ .**

|                                               |                                                                                 |
|-----------------------------------------------|---------------------------------------------------------------------------------|
| Empirical formula                             | $\text{C}_{192}\text{H}_{288}\text{Ag}_{45}\text{Cl}_6\text{F}_{24}\text{Sb}_4$ |
| Formula weight                                | 8606.06                                                                         |
| Temperature/K                                 | 150.00                                                                          |
| Crystal system                                | triclinic                                                                       |
| Space group                                   | $P-1$                                                                           |
| $a/\text{\AA}$                                | 19.854(4)                                                                       |
| $b/\text{\AA}$                                | 20.442(4)                                                                       |
| $c/\text{\AA}$                                | 20.492(4)                                                                       |
| $\alpha/^\circ$                               | 102.885(6)                                                                      |
| $\beta/^\circ$                                | 116.443(5)                                                                      |
| $\gamma/^\circ$                               | 108.691(6)                                                                      |
| Volume/ $\text{\AA}^3$                        | 6364(2)                                                                         |
| Z                                             | 1                                                                               |
| $\rho_{\text{calc}}/\text{g/cm}^3$            | 2.245                                                                           |
| $\mu/\text{mm}^{-1}$                          | 3.902                                                                           |
| F(000)                                        | 4077.0                                                                          |
| Crystal size/ $\text{mm}^3$                   | $0.12 \times 0.11 \times 0.1$                                                   |
| Radiation                                     | MoK $\alpha$ ( $\lambda = 0.71073$ )                                            |
| $2\Theta$ range for data collection/ $^\circ$ | 4.482 to 41.63                                                                  |
| Index ranges                                  | $-19 \leq h \leq 19, -20 \leq k \leq 20, -19 \leq l \leq 20$                    |
| Reflections collected                         | 35923                                                                           |
| Independent reflections                       | 13225 [ $R_{\text{int}} = 0.0864, R_{\text{sigma}} = 0.0995$ ]                  |
| Data/restraints/parameters                    | 13225/1478/1264                                                                 |
| Goodness-of-fit on $F^2$                      | 1.352                                                                           |
| Final R indexes [ $I \geq 2\sigma(I)$ ]       | $R_1 = 0.1303, wR_2 = 0.3589$                                                   |
| Final R indexes [all data]                    | $R_1 = 0.2004, wR_2 = 0.4174$                                                   |
| Largest diff. peak/hole / $e \text{\AA}^{-3}$ | 3.45/-2.22                                                                      |

a, the crystal data only contains six chlorines, but ESI, EDX and XPS data imply the multi-dispersity of Cl and S in the cluster. Due to the poor quality of the data, it was not further refined with bromine and sulfur as co-occupied.

**Table 2 Crystal data and structure refinement for  $\{\text{Ag}_{45}(\text{BrS})_6\}^{\text{a}}$ .**

|                                                              |                                                                              |
|--------------------------------------------------------------|------------------------------------------------------------------------------|
| Empirical formula                                            | $\text{Ag}_{45}\text{Br}_6\text{C}_{192}\text{F}_{24}\text{Sb}_4$            |
| Formula weight                                               | 8582.53                                                                      |
| Temperature/K                                                | 273.15                                                                       |
| Crystal system                                               | triclinic                                                                    |
| Space group                                                  | <i>P</i> -1                                                                  |
| <i>a</i> /Å                                                  | 18.711(5)                                                                    |
| <i>b</i> /Å                                                  | 20.882(6)                                                                    |
| <i>c</i> /Å                                                  | 21.381(6)                                                                    |
| $\alpha$ /°                                                  | 110.987(9)                                                                   |
| $\beta$ /°                                                   | 114.356(9)                                                                   |
| $\gamma$ /°                                                  | 99.657(9)                                                                    |
| Volume/Å <sup>3</sup>                                        | 6599(3)                                                                      |
| <i>Z</i>                                                     | 1                                                                            |
| $\rho_{\text{calc}}/\text{g}/\text{cm}^3$                    | 2.160                                                                        |
| $\mu/\text{mm}^{-1}$                                         | 4.609                                                                        |
| <i>F</i> (000)                                               | 3897.0                                                                       |
| Crystal size/ $\text{mm}^3$                                  | 0.13 × 0.12 × 0.11                                                           |
| Radiation                                                    | MoK $\alpha$ ( $\lambda$ = 0.71073)                                          |
| 2 $\theta$ range for data collection/°                       | 4.424 to 31.98                                                               |
| Index ranges                                                 | -14 ≤ <i>h</i> ≤ 14, -16 ≤ <i>k</i> ≤ 16, -14 ≤ <i>l</i> ≤ 16                |
| Reflections collected                                        | 19809                                                                        |
| Independent reflections                                      | 6412 [ <i>R</i> <sub>int</sub> = 0.0954, <i>R</i> <sub>sigma</sub> = 0.1117] |
| Data/restraints/parameters                                   | 6412/2681/1222                                                               |
| Goodness-of-fit on <i>F</i> <sup>2</sup>                     | 1.498                                                                        |
| Final <i>R</i> indexes [ <i>I</i> ≥ 2 $\sigma$ ( <i>I</i> )] | <i>R</i> <sub>1</sub> = 0.1364, <i>wR</i> <sub>2</sub> = 0.3699              |
| Final <i>R</i> indexes [all data]                            | <i>R</i> <sub>1</sub> = 0.1938, <i>wR</i> <sub>2</sub> = 0.4185              |
| Largest diff. peak/hole / e Å <sup>-3</sup>                  | 2.24/-1.15                                                                   |

a, the crystal data only contains six bromines, but ESI, EDX and XPS data imply the multi-dispersity of Br and S in the cluster. Due to the poor quality of the data, it was not further refined with bromine and sulfur as co-occupied.

**Table 3 Crystal data and structure refinement for {Ag<sub>148</sub>(BrS)<sub>56</sub>}.**

|                                             |                                                                                      |
|---------------------------------------------|--------------------------------------------------------------------------------------|
| Empirical formula                           | C <sub>360</sub> H <sub>540</sub> Ag <sub>148</sub> Br <sub>30</sub> S <sub>26</sub> |
| Formula weight                              | 24063.51                                                                             |
| Temperature/K                               | 150.0                                                                                |
| Crystal system                              | tetragonal                                                                           |
| Space group                                 | P4/mnc                                                                               |
| a/Å                                         | 30.517(4)                                                                            |
| b/Å                                         | 30.517(4)                                                                            |
| c/Å                                         | 35.190(6)                                                                            |
| α/°                                         | 90                                                                                   |
| β/°                                         | 90                                                                                   |
| γ/°                                         | 90                                                                                   |
| Volume/Å <sup>3</sup>                       | 32773(11)                                                                            |
| Z                                           | 2                                                                                    |
| ρ <sub>calc</sub> /g/cm <sup>3</sup>        | 2.439                                                                                |
| μ/mm <sup>-1</sup>                          | 6.242                                                                                |
| F(000)                                      | 22244.0                                                                              |
| Crystal size/mm <sup>3</sup>                | 0.12 × 0.11 × 0.1                                                                    |
| Radiation                                   | MoKα (λ = 0.71073)                                                                   |
| 2θ range for data collection/°              | 1.766 to 37.694                                                                      |
| Index ranges                                | -27 ≤ h ≤ 25, -27 ≤ k ≤ 27, -31 ≤ l ≤ 31                                             |
| Reflections collected                       | 58977                                                                                |
| Independent reflections                     | 6603 [R <sub>int</sub> = 0.0919, R <sub>sigma</sub> = 0.0565]                        |
| Data/restraints/parameters                  | 6603/1148/671                                                                        |
| Goodness-of-fit on F <sup>2</sup>           | 1.511                                                                                |
| Final R indexes [I ≥ 2σ (I)]                | R <sub>1</sub> = 0.1233, wR <sub>2</sub> = 0.3418                                    |
| Final R indexes [all data]                  | R <sub>1</sub> = 0.1586, wR <sub>2</sub> = 0.3783                                    |
| Largest diff. peak/hole / e Å <sup>-3</sup> | 5.21 <sup>a</sup> /-2.02                                                             |

a: the 5.21 electron density peak at the very center of the cluster may be attributed to a disordered anion.

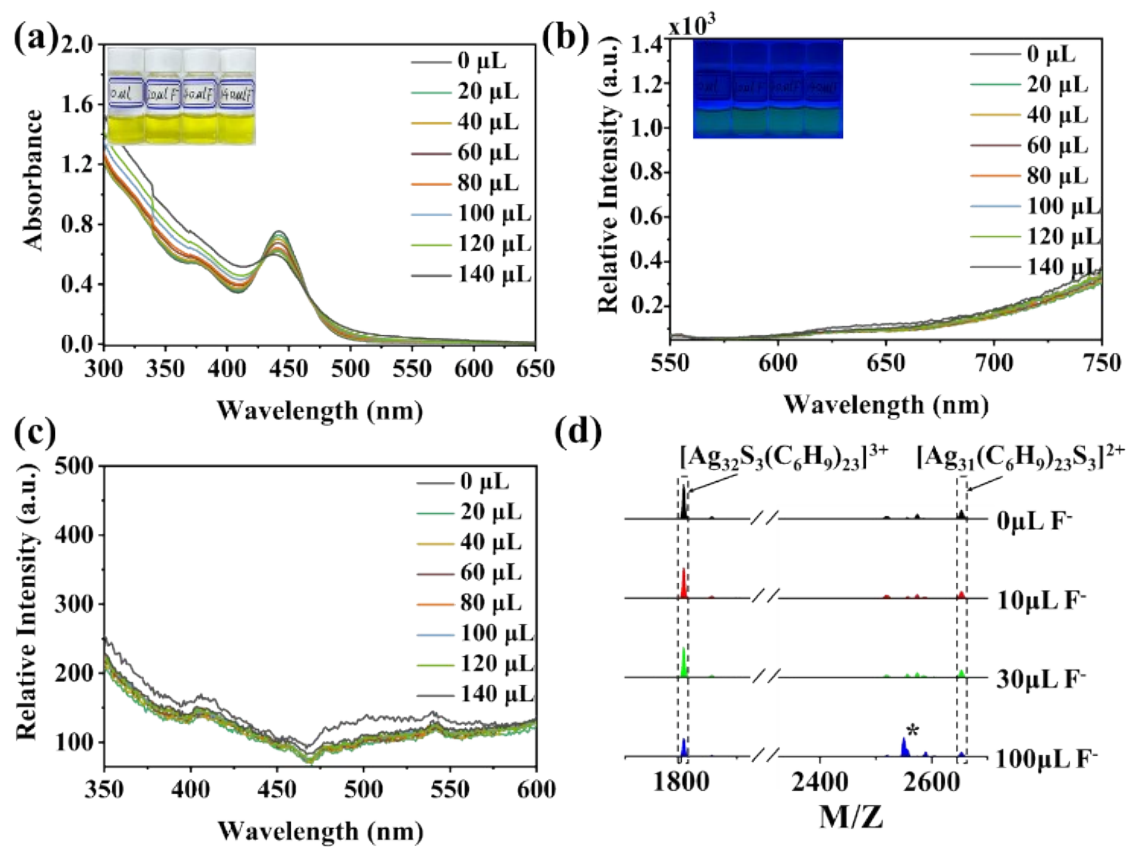

Figure S1. The UV/Vis spectra (a), emission spectra (b), excitation spectra (c), and positive-ion mode ESI-MS (d) of  $\{Ag_{32}S_3\}$  at varying  $F^-$  amounts.  $*[Ag_{45}S_4Cl_2]^{3+}$  was formed by trace amounts of  $Cl^-$  in solvent.

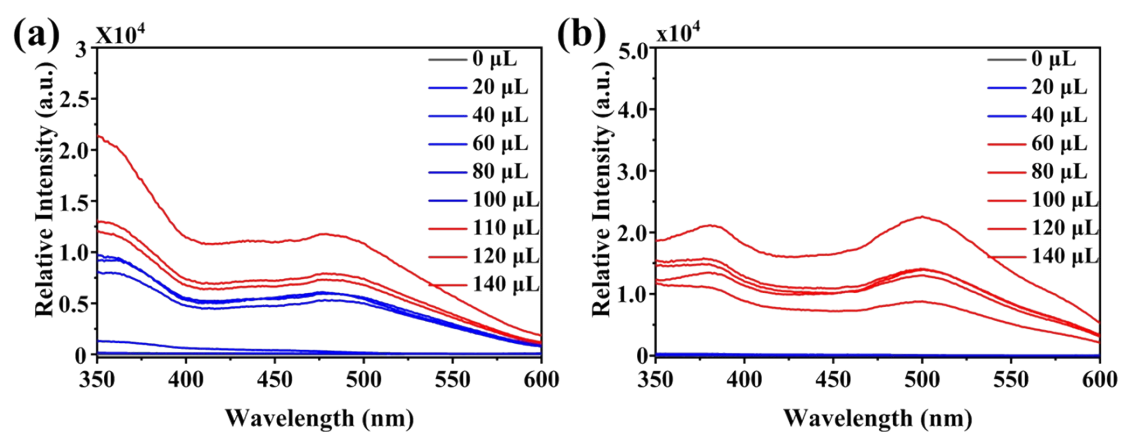

Figure S2. excitation spectra of methanolic solutions of  $\{Ag_{32}S_3\}$  with different concentrations of halide ions ( $X^-$ ). (a)  $Cl^-$ . (b)  $Br^-$ .

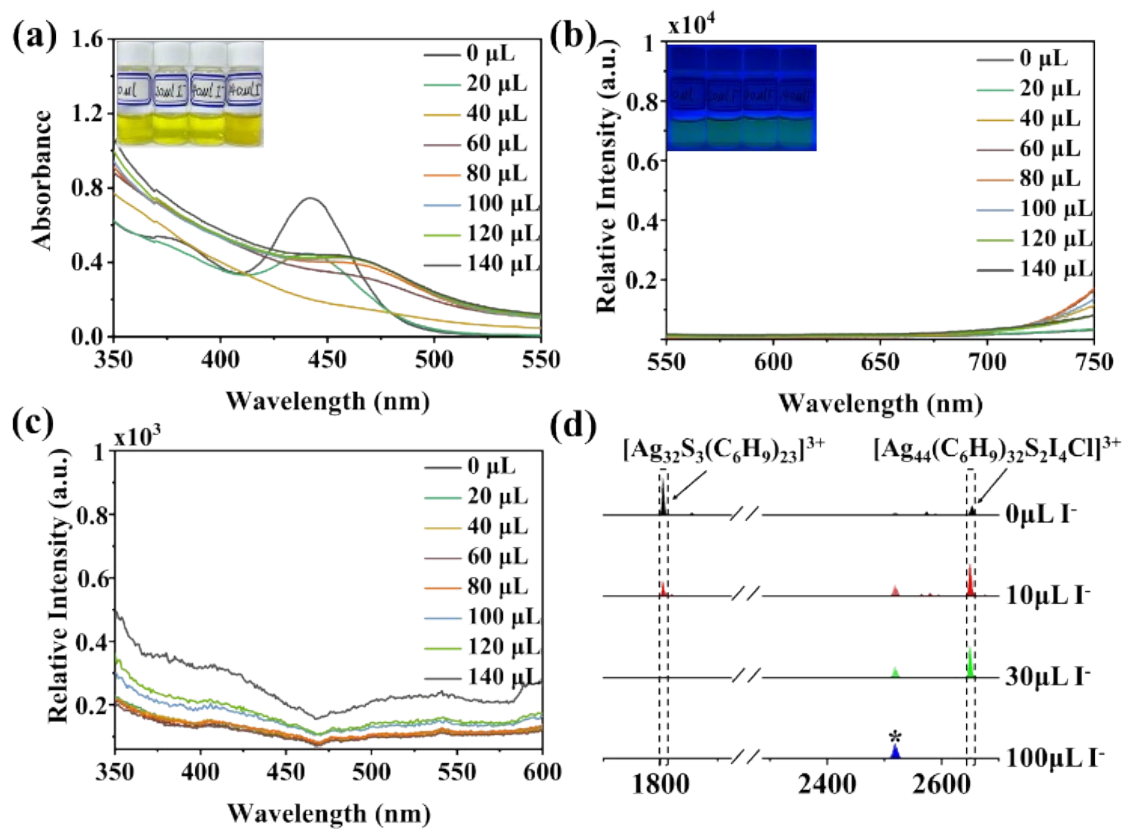

Figure S3. The UV/Vis spectra (a), emission spectra (b), excitation spectra (c), and positive-ion mode ESI-MS (d) of  $\{Ag_{32}S_3\}$  at varying  $I^-$  amounts.  $*[Ag_{14}(C_6H_9)_{12}Cl]^+$ .



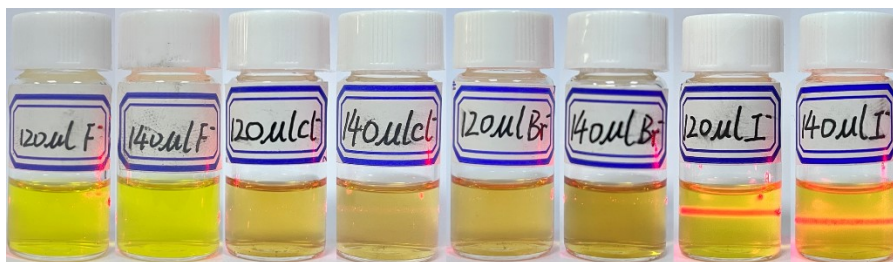

Figure S4. Pictures of solutions of  $\{Ag_{32}S_3\}$  with different halogen ions added under laser pointer illumination.

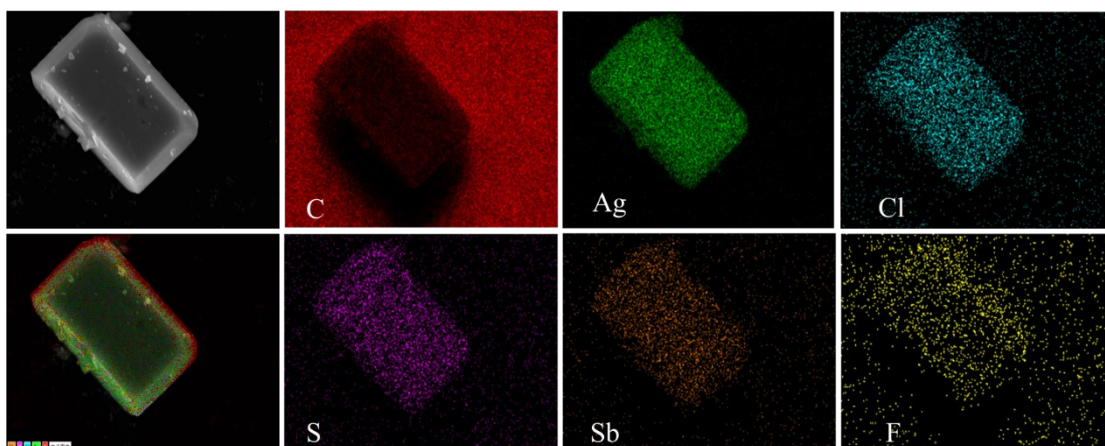

Figure S5. The energy dispersive spectroscopy (EDS) mapping results on an SEM image of single particle of  $\{Ag_{45}(ClS)_6\}$ . The scale bar is 5  $\mu m$ .

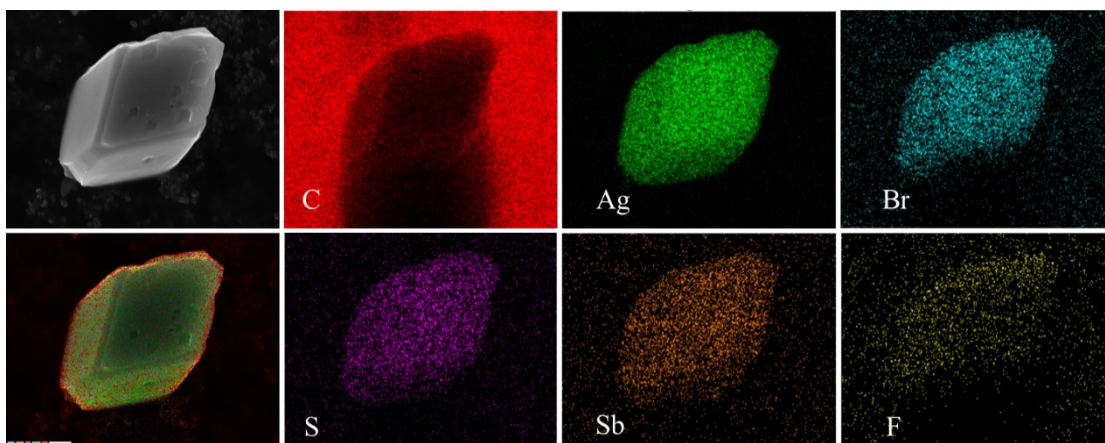

Figure S6. The energy dispersive spectroscopy (EDS) mapping results on an SEM image of single particle of  $\{Ag_{45}(BrS)_6\}$ . The scale bar is 2.5  $\mu m$ .

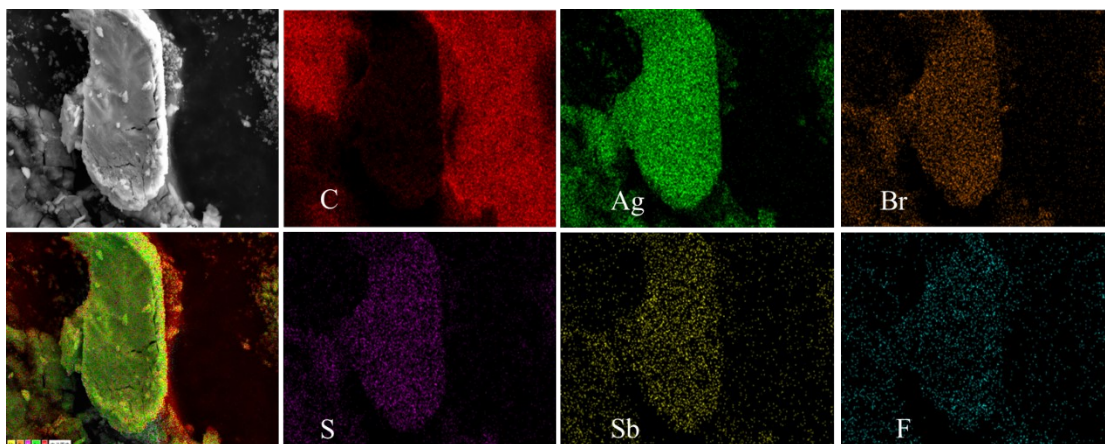

Figure S7. The energy dispersive spectroscopy (EDS) mapping results on an SEM image of single particle of  $\{Ag_{148}(BrS)_{56}\}$ . The scale bar is 10  $\mu m$ .

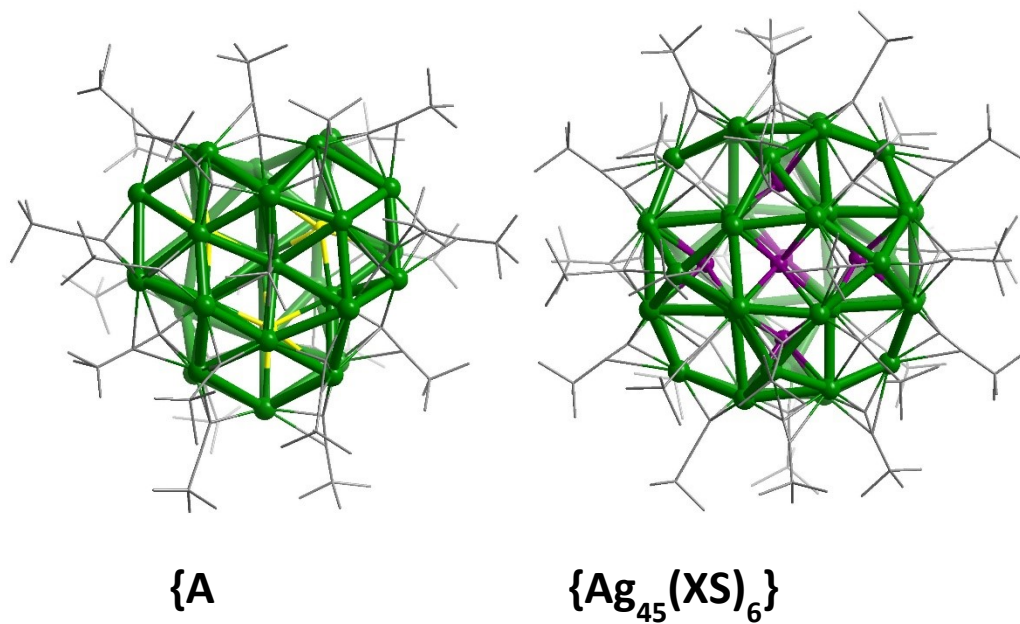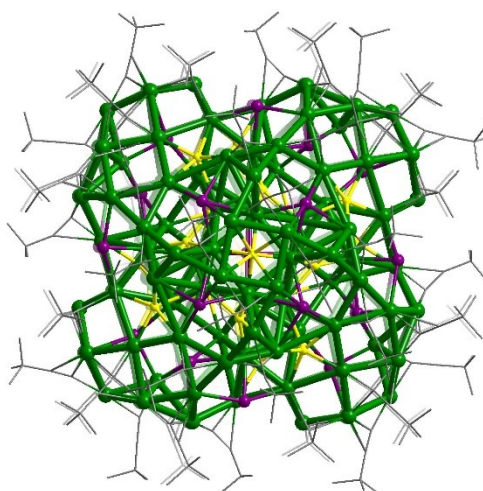

Figure S8. The structures of  $\{\text{Ag}_{32}\text{S}_3\}$ ,  $\{\text{Ag}_{45}(\text{BrS})_6\}$ ,  $\{\text{Ag}_{148}(\text{BrS})_{56}\}$ .

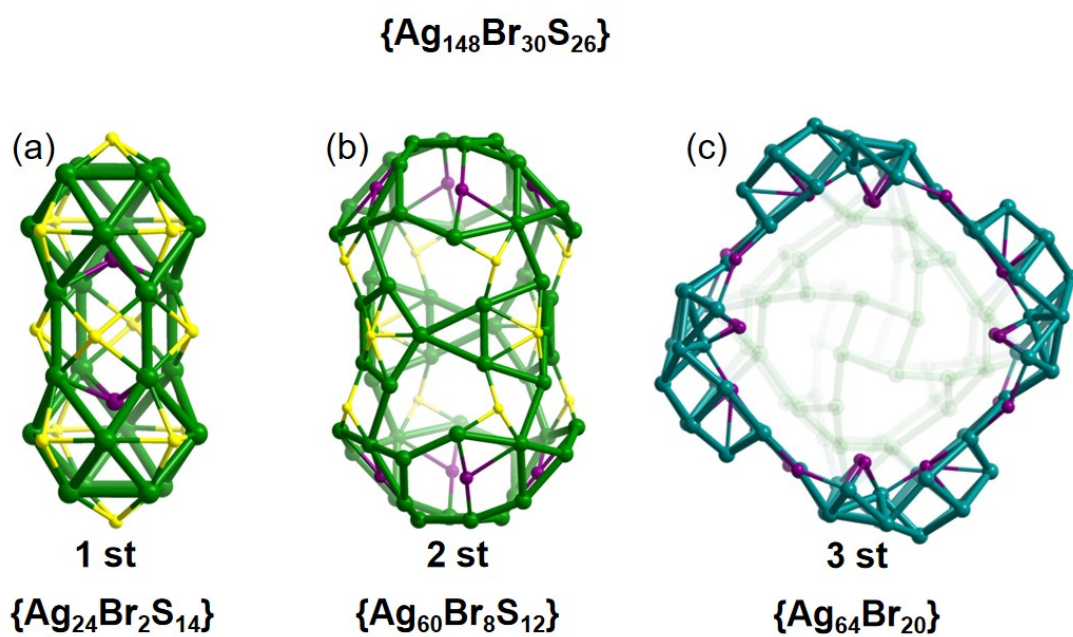

Figure S9. The positions of the Br shown in violet in the  $\{\text{Ag}_{148}(\text{BrS})_{56}\}$ . S and Cl in previously reported  $\{\text{Ag}_{148}(\text{ClS})_{56}\}$  cannot be distinguished due to their similar electron densities.

The crystal data only contains thirty bromines, but ESI, EDX and XPS data imply the multi-dispersity of Br and S in the cluster.

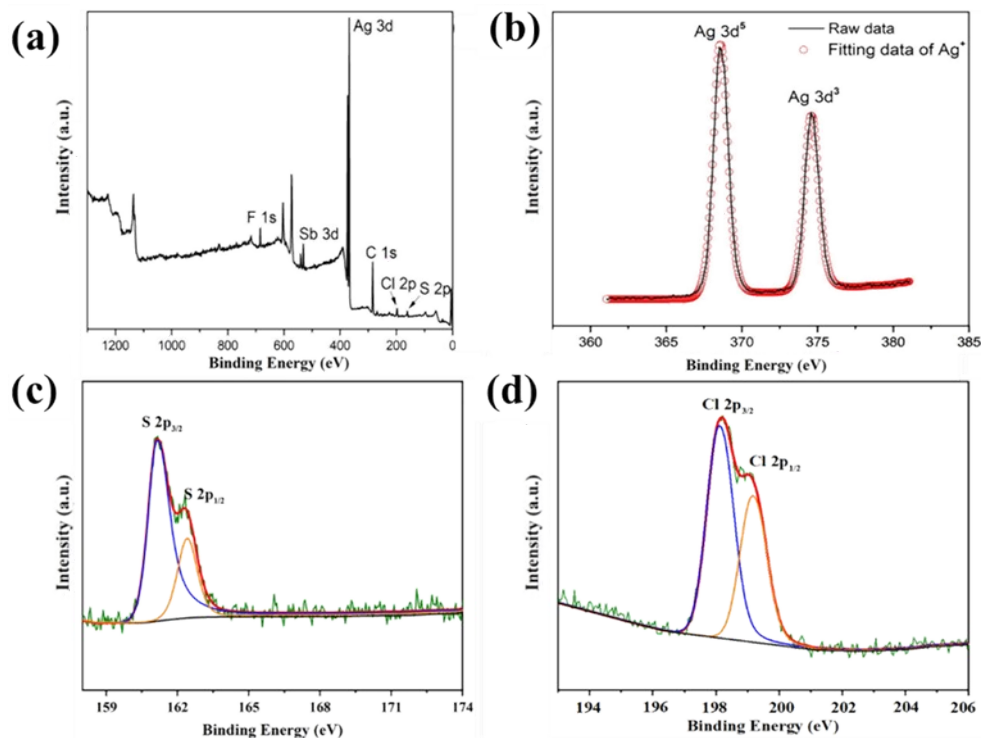

Figure S10. (a) XPS spectrum of  $\text{Ag}_{148}\text{Cl}$ ; (b), (c) and (d) are the high resolution XPS spectra of Ag, S and Cl in  $\{\text{Ag}_{148}(\text{ClS})_{56}\}$ , respectively.

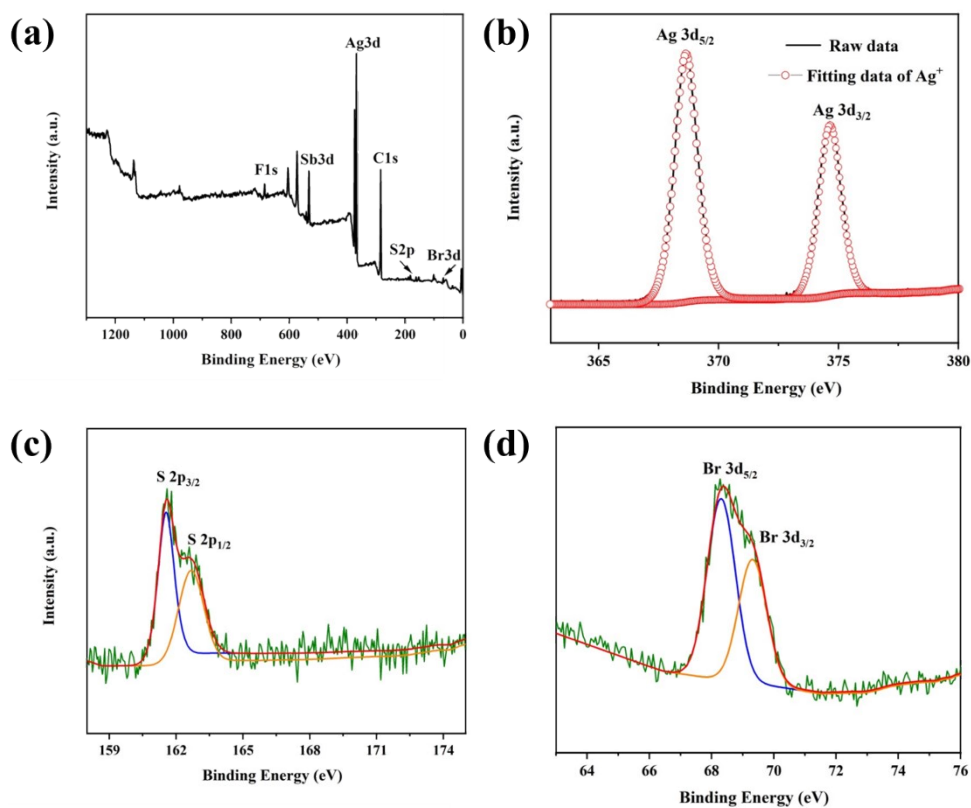

Figure S11. (a) XPS spectrum of  $\text{Ag}_{148}\text{Br}$ ; (b), (c) and (d) are the high resolution XPS spectra of Ag, S and Br in  $\{\text{Ag}_{148}(\text{BrS})_{56}\}$ , respectively.

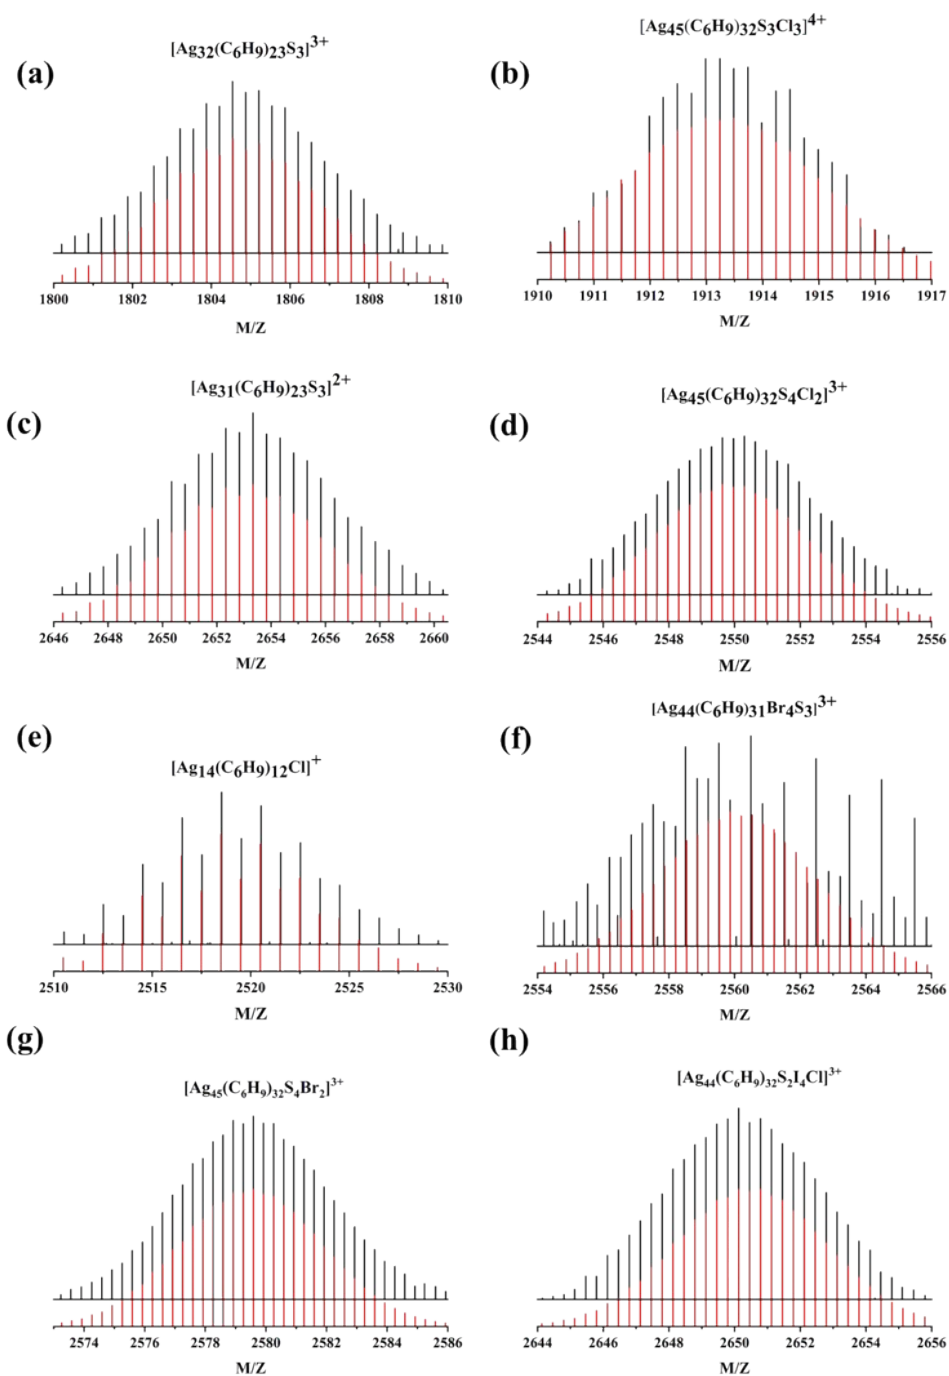

Figure S12. Comparison diagram of experimental peak (black line) and simulated isotope distribution peak (red line) within 1700-2700 M/Z.

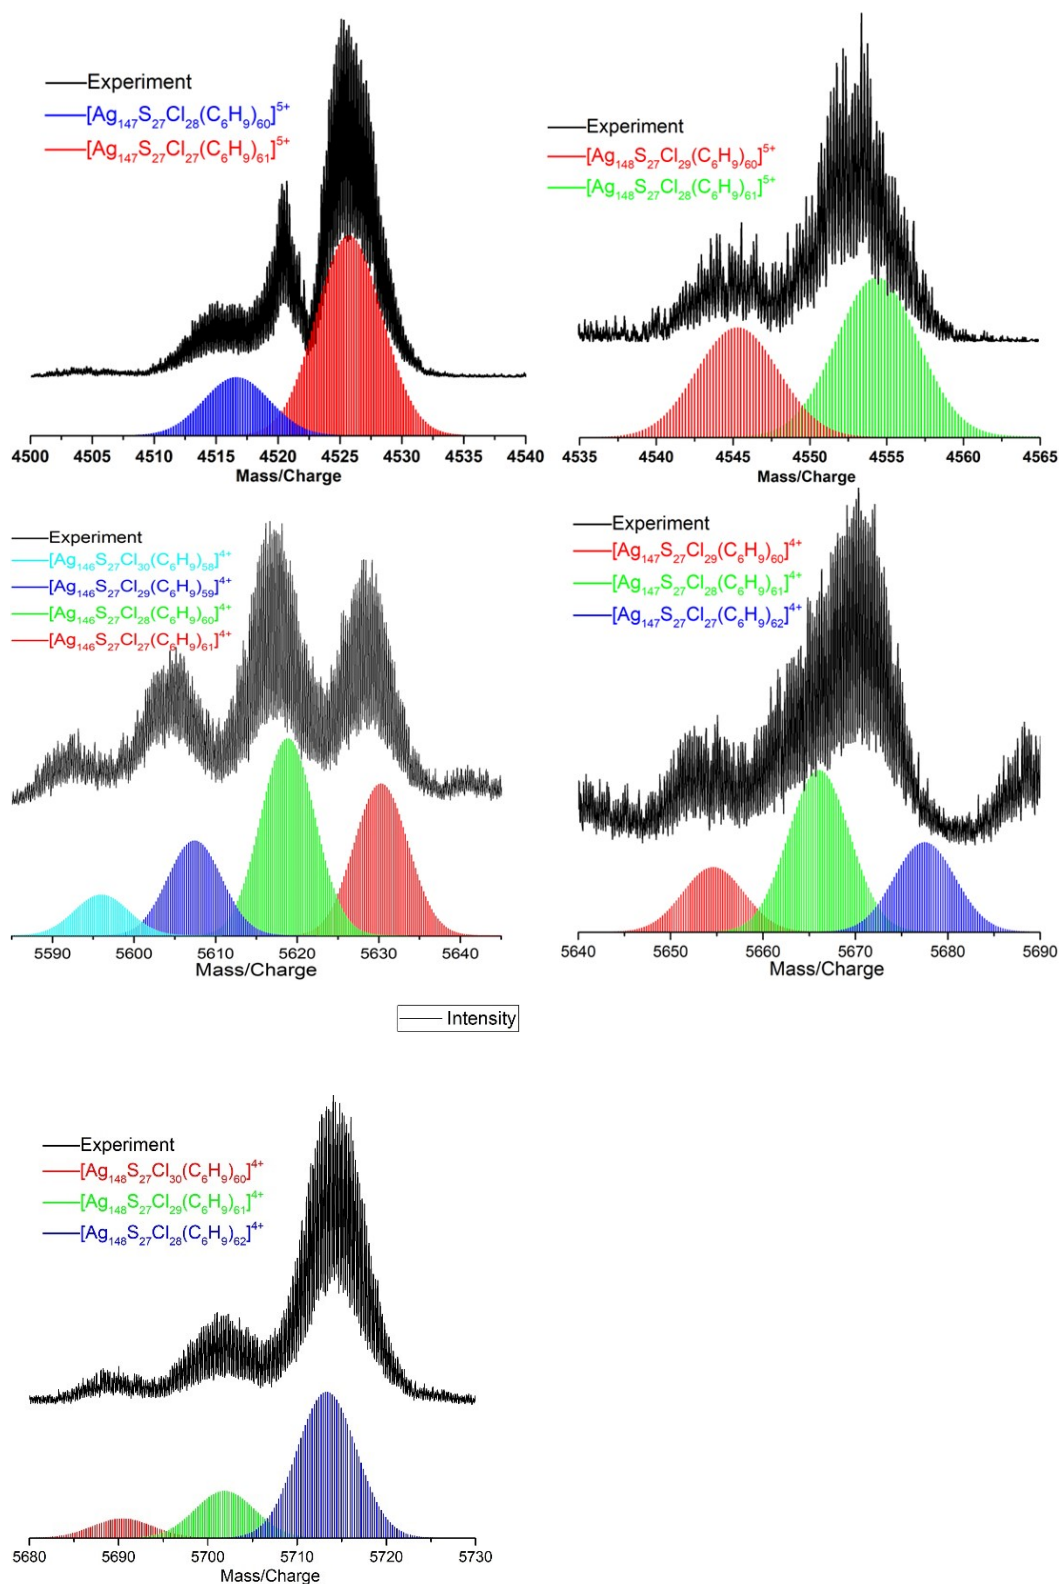

Figure S13. Fragments identified in ESI-MS of  $\{Ag_{148}(ClIS)_{56}\}$ .

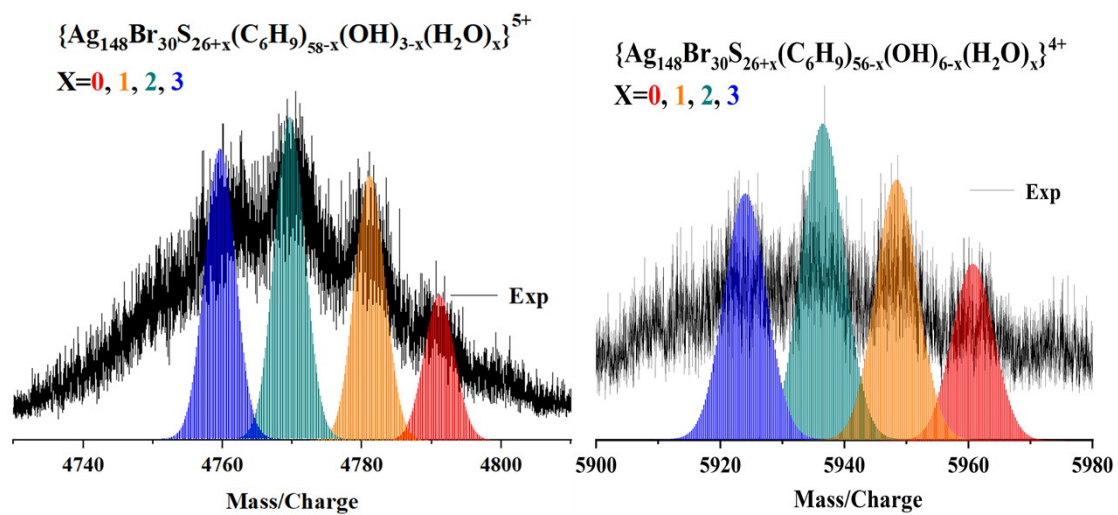

Figure S14. Fragments identified in ESI-MS of  $\{\text{Ag}_{148}(\text{BrS})_{56}\}$ .
